# Supplementary material for: Towards Patient-Centered Conflicts of Interest Policy
Source: PubMed Central journal article supplement (PMC5819371; doi:10.15171/ijhpm.2017.128), 2017-10-29
Supplement: ijhpm-7-112-s001.pdf [file ijhpm-7-112-s001.pdf]

## Statistical Analysis

### Methods:

Q1 was recorded assuming it is the question asking about the importance of physician-industry disclosure to unimportant (1 and 2) and important (3 and 4). The refused are treated as missing.

A 4-category variable was created for age, and a 4-category variable was created for income. The categories are shown in the attached results. The results contain the following output:

1. Pages 1-3 provide the unweighted distribution of each variable. Also included are other variables such as race, education, marital status, employment status, own or rent home, housing type, and households with internet access.
2. Pages 4-6 show the weighted distribution of these variables.
3. Pages 7-17 shows the weighted two-way crosstab tables for each variable and the dichotomous Q1 variable. None of the variables are significantly associated with Q1.
4. Pages 18-21 show the logistic regression (weighted) with the dichotomous Q1 variable as the outcome and gender, age, income and region in the model. None is significant and other variables were not added because none of them are significant in step 3.

| q1_dummy              | Frequency | Percent | Cumulative Frequency | Cumulative Percent |
|-----------------------|-----------|---------|----------------------|--------------------|
| important             | 633       | 63.30   | 633                  | 63.30              |
| unimportant           | 367       | 36.70   | 1000                 | 100.00             |
| Frequency Missing = 5 |           |         |                      |                    |

| PPGENDER Sex of respondent |           |         |                      |                    |
|----------------------------|-----------|---------|----------------------|--------------------|
| ppgender                   | Frequency | Percent | Cumulative Frequency | Cumulative Percent |
| male                       | 510       | 50.75   | 510                  | 50.75              |
| female                     | 495       | 49.25   | 1005                 | 100.00             |

| age4  | Frequency | Percent | Cumulative Frequency | Cumulative Percent |
|-------|-----------|---------|----------------------|--------------------|
| 18-34 | 322       | 32.04   | 322                  | 32.04              |
| 35-49 | 234       | 23.28   | 556                  | 55.32              |
| 50-64 | 295       | 29.35   | 851                  | 84.68              |
| 65+   | 154       | 15.32   | 1005                 | 100.00             |

| income4    | Frequency | Percent | Cumulative Frequency | Cumulative Percent |
|------------|-----------|---------|----------------------|--------------------|
| <\$25K     | 145       | 14.43   | 145                  | 14.43              |
| \$25-49.9K | 209       | 20.80   | 354                  | 35.22              |
| \$50-74.9K | 207       | 20.60   | 561                  | 55.82              |
| \$75K+     | 444       | 44.18   | 1005                 | 100.00             |

| region    | Frequency | Percent | Cumulative Frequency | Cumulative Percent |
|-----------|-----------|---------|----------------------|--------------------|
| Northeast | 172       | 17.11   | 172                  | 17.11              |
| Midwest   | 243       | 24.18   | 415                  | 41.29              |
| South     | 354       | 35.22   | 769                  | 76.52              |
| West      | 236       | 23.48   | 1005                 | 100.00             |

| <b>PPETHM Race</b>            |                  |                |                             |                           |
|-------------------------------|------------------|----------------|-----------------------------|---------------------------|
| <b>ppethm</b>                 | <b>Frequency</b> | <b>Percent</b> | <b>Cumulative Frequency</b> | <b>Cumulative Percent</b> |
| <b>White, Non-Hispanic</b>    | 735              | 73.13          | 735                         | 73.13                     |
| <b>Black, Non-Hispanic</b>    | 76               | 7.56           | 811                         | 80.70                     |
| <b>Other, Non-Hispanic</b>    | 42               | 4.18           | 853                         | 84.88                     |
| <b>Hispanic</b>               | 110              | 10.95          | 963                         | 95.82                     |
| <b>2+ Races, Non-Hispanic</b> | 42               | 4.18           | 1005                        | 100.00                    |

| <b>PPEDUC Education</b>                 |                  |                |                             |                           |
|-----------------------------------------|------------------|----------------|-----------------------------|---------------------------|
| <b>ppeduc</b>                           | <b>Frequency</b> | <b>Percent</b> | <b>Cumulative Frequency</b> | <b>Cumulative Percent</b> |
| <b>Less than HS graduate</b>            | 97               | 9.65           | 97                          | 9.65                      |
| <b>HS grad</b>                          | 284              | 28.26          | 381                         | 37.91                     |
| <b>Some college, no degree</b>          | 195              | 19.40          | 576                         | 57.31                     |
| <b>Associate degree</b>                 | 85               | 8.46           | 661                         | 65.77                     |
| <b>Bachelor degree</b>                  | 197              | 19.60          | 858                         | 85.37                     |
| <b>Master degree</b>                    | 113              | 11.24          | 971                         | 96.62                     |
| <b>Professional or Doctorate degree</b> | 34               | 3.38           | 1005                        | 100.00                    |

| <b>PPMARIT Marital status</b> |                  |                |                             |                           |
|-------------------------------|------------------|----------------|-----------------------------|---------------------------|
| <b>ppmarit</b>                | <b>Frequency</b> | <b>Percent</b> | <b>Cumulative Frequency</b> | <b>Cumulative Percent</b> |
| <b>Married</b>                | 541              | 53.83          | 541                         | 53.83                     |
| <b>Widowed</b>                | 33               | 3.28           | 574                         | 57.11                     |
| <b>Divorced</b>               | 86               | 8.56           | 660                         | 65.67                     |
| <b>Separated</b>              | 13               | 1.29           | 673                         | 66.97                     |
| <b>Never married</b>          | 266              | 26.47          | 939                         | 93.43                     |
| <b>Living with partner</b>    | 66               | 6.57           | 1005                        | 100.00                    |

| <b>PPWORK Employment Status</b>                     |                  |                |                             |                           |
|-----------------------------------------------------|------------------|----------------|-----------------------------|---------------------------|
| <b>ppwork</b>                                       | <b>Frequency</b> | <b>Percent</b> | <b>Cumulative Frequency</b> | <b>Cumulative Percent</b> |
| <b>Working-as a paid employee</b>                   | 535              | 53.23          | 535                         | 53.23                     |
| <b>Working-self-employed</b>                        | 69               | 6.87           | 604                         | 60.10                     |
| <b>Not working - on temporary layoff from a job</b> | 7                | 0.70           | 611                         | 60.80                     |
| <b>Not working - looking for work</b>               | 82               | 8.16           | 693                         | 68.96                     |
| <b>Not working - retired</b>                        | 145              | 14.43          | 838                         | 83.38                     |
| <b>Not working - disabled</b>                       | 59               | 5.87           | 897                         | 89.25                     |
| <b>Not working - other</b>                          | 108              | 10.75          | 1005                        | 100.00                    |

| <b>PPRENT Own or rent home</b>                                   |                  |                |                             |                           |
|------------------------------------------------------------------|------------------|----------------|-----------------------------|---------------------------|
| <b>pprent</b>                                                    | <b>Frequency</b> | <b>Percent</b> | <b>Cumulative Frequency</b> | <b>Cumulative Percent</b> |
| <b>Owned or being bought by you or someone in your household</b> | 714              | 71.04          | 714                         | 71.04                     |
| <b>Rented for cash</b>                                           | 258              | 25.67          | 972                         | 96.72                     |
| <b>Occupied without payment of cash rent</b>                     | 33               | 3.28           | 1005                        | 100.00                    |

| <b>PPHOUSE Housing type</b>                              |                  |                |                             |                           |
|----------------------------------------------------------|------------------|----------------|-----------------------------|---------------------------|
| <b>pphouse</b>                                           | <b>Frequency</b> | <b>Percent</b> | <b>Cumulative Frequency</b> | <b>Cumulative Percent</b> |
| <b>A one-family house detached from any other house</b>  | 732              | 72.84          | 732                         | 72.84                     |
| <b>A one-family house attached to one or more houses</b> | 64               | 6.37           | 796                         | 79.20                     |
| <b>A building with 2 or more apartments</b>              | 164              | 16.32          | 960                         | 95.52                     |
| <b>A mobile home</b>                                     | 41               | 4.08           | 1001                        | 99.60                     |
| <b>Boat/RV/van etc.</b>                                  | 4                | 0.40           | 1005                        | 100.00                    |

| <b>PPNET HHs with Internet Access</b> |                  |                |                             |                           |
|---------------------------------------|------------------|----------------|-----------------------------|---------------------------|
| <b>ppnet</b>                          | <b>Frequency</b> | <b>Percent</b> | <b>Cumulative Frequency</b> | <b>Cumulative Percent</b> |
| <b>Yes</b>                            | 829              | 82.49          | 829                         | 82.49                     |
| <b>No</b>                             | 176              | 17.51          | 1005                        | 100.00                    |

| q1_dummy                               | Frequency | Percent | Cumulative Frequency | Cumulative Percent |
|----------------------------------------|-----------|---------|----------------------|--------------------|
| <b>important</b>                       | 634.7643  | 63.85   | 634.7643             | 63.85              |
| <b>unimportant</b>                     | 359.3343  | 36.15   | 994.0987             | 100.00             |
| <b>Frequency Missing = 5.901199965</b> |           |         |                      |                    |

| <b>PPGENDER Sex of respondent</b> |           |         |                      |                    |
|-----------------------------------|-----------|---------|----------------------|--------------------|
| ppgender                          | Frequency | Percent | Cumulative Frequency | Cumulative Percent |
| <b>male</b>                       | 484.061   | 48.41   | 484.061              | 48.41              |
| <b>female</b>                     | 515.9389  | 51.59   | 999.9999             | 100.00             |

| age4         | Frequency | Percent | Cumulative Frequency | Cumulative Percent |
|--------------|-----------|---------|----------------------|--------------------|
| <b>18-34</b> | 296.7177  | 29.67   | 296.7177             | 29.67              |
| <b>35-49</b> | 226.0318  | 22.60   | 522.7495             | 52.27              |
| <b>50-64</b> | 290.1755  | 29.02   | 812.925              | 81.29              |
| <b>65+</b>   | 187.0749  | 18.71   | 999.9999             | 100.00             |

| income4           | Frequency | Percent | Cumulative Frequency | Cumulative Percent |
|-------------------|-----------|---------|----------------------|--------------------|
| <b>&lt;\$25K</b>  | 179       | 17.90   | 179                  | 17.90              |
| <b>\$25-49.9K</b> | 225       | 22.50   | 403.9999             | 40.40              |
| <b>\$50-74.9K</b> | 184       | 18.40   | 587.9999             | 58.80              |
| <b>\$75K+</b>     | 411.9999  | 41.20   | 999.9999             | 100.00             |

| region           | Frequency | Percent | Cumulative Frequency | Cumulative Percent |
|------------------|-----------|---------|----------------------|--------------------|
| <b>Northeast</b> | 182.9905  | 18.30   | 182.9905             | 18.30              |
| <b>Midwest</b>   | 213.9907  | 21.40   | 396.9812             | 39.70              |
| <b>South</b>     | 373.9388  | 37.39   | 770.92               | 77.09              |
| <b>West</b>      | 229.0799  | 22.91   | 999.9999             | 100.00             |

| <b>PPETHM Race</b>            |                  |                |                             |                           |
|-------------------------------|------------------|----------------|-----------------------------|---------------------------|
| <b>ppethm</b>                 | <b>Frequency</b> | <b>Percent</b> | <b>Cumulative Frequency</b> | <b>Cumulative Percent</b> |
| <b>White, Non-Hispanic</b>    | 657.0694         | 65.71          | 657.0694                    | 65.71                     |
| <b>Black, Non-Hispanic</b>    | 115.9814         | 11.60          | 773.0508                    | 77.31                     |
| <b>Other, Non-Hispanic</b>    | 62.99878         | 6.30           | 836.0496                    | 83.60                     |
| <b>Hispanic</b>               | 151.9437         | 15.19          | 987.9933                    | 98.80                     |
| <b>2+ Races, Non-Hispanic</b> | 12.00658         | 1.20           | 999.9999                    | 100.00                    |

| <b>PPEDUC Education</b>                 |                  |                |                             |                           |
|-----------------------------------------|------------------|----------------|-----------------------------|---------------------------|
| <b>ppeduc</b>                           | <b>Frequency</b> | <b>Percent</b> | <b>Cumulative Frequency</b> | <b>Cumulative Percent</b> |
| <b>Less than HS graduate</b>            | 124.0375         | 12.40          | 124.0375                    | 12.40                     |
| <b>HS grad</b>                          | 296.0044         | 29.60          | 420.0419                    | 42.00                     |
| <b>Some college, no degree</b>          | 199.5967         | 19.96          | 619.6386                    | 61.96                     |
| <b>Associate degree</b>                 | 88.43436         | 8.84           | 708.0729                    | 70.81                     |
| <b>Bachelor degree</b>                  | 163.7655         | 16.38          | 871.8384                    | 87.18                     |
| <b>Master degree</b>                    | 100.7999         | 10.08          | 972.6384                    | 97.26                     |
| <b>Professional or Doctorate degree</b> | 27.36151         | 2.74           | 999.9999                    | 100.00                    |

| <b>PPMARIT Marital status</b> |                  |                |                             |                           |
|-------------------------------|------------------|----------------|-----------------------------|---------------------------|
| <b>ppmarit</b>                | <b>Frequency</b> | <b>Percent</b> | <b>Cumulative Frequency</b> | <b>Cumulative Percent</b> |
| <b>Married</b>                | 524.9136         | 52.49          | 524.9136                    | 52.49                     |
| <b>Widowed</b>                | 45.36483         | 4.54           | 570.2784                    | 57.03                     |
| <b>Divorced</b>               | 94.59633         | 9.46           | 664.8748                    | 66.49                     |
| <b>Separated</b>              | 16.46967         | 1.65           | 681.3444                    | 68.13                     |
| <b>Never married</b>          | 256.1972         | 25.62          | 937.5416                    | 93.75                     |
| <b>Living with partner</b>    | 62.45825         | 6.25           | 999.9999                    | 100.00                    |

| <b>PPWORK Employment Status</b>                     |                  |                |                             |                           |
|-----------------------------------------------------|------------------|----------------|-----------------------------|---------------------------|
| <b>ppwork</b>                                       | <b>Frequency</b> | <b>Percent</b> | <b>Cumulative Frequency</b> | <b>Cumulative Percent</b> |
| <b>Working-as a paid employee</b>                   | 495.3614         | 49.54          | 495.3614                    | 49.54                     |
| <b>Working-self-employed</b>                        | 62.70955         | 6.27           | 558.071                     | 55.81                     |
| <b>Not working - on temporary layoff from a job</b> | 6.58408          | 0.66           | 564.6551                    | 56.47                     |
| <b>Not working - looking for work</b>               | 87.96082         | 8.80           | 652.6159                    | 65.26                     |
| <b>Not working - retired</b>                        | 170.8433         | 17.08          | 823.4592                    | 82.35                     |
| <b>Not working - disabled</b>                       | 68.96151         | 6.90           | 892.4207                    | 89.24                     |
| <b>Not working - other</b>                          | 107.5792         | 10.76          | 999.9999                    | 100.00                    |

| <b>PPRENT Own or rent home</b>                                   |                  |                |                             |                           |
|------------------------------------------------------------------|------------------|----------------|-----------------------------|---------------------------|
| <b>pprent</b>                                                    | <b>Frequency</b> | <b>Percent</b> | <b>Cumulative Frequency</b> | <b>Cumulative Percent</b> |
| <b>Owned or being bought by you or someone in your household</b> | 694.7943         | 69.48          | 694.7943                    | 69.48                     |
| <b>Rented for cash</b>                                           | 269.7932         | 26.98          | 964.5875                    | 96.46                     |
| <b>Occupied without payment of cash rent</b>                     | 35.41234         | 3.54           | 999.9999                    | 100.00                    |

| <b>PPHOUSE Housing type</b>                              |                  |                |                             |                           |
|----------------------------------------------------------|------------------|----------------|-----------------------------|---------------------------|
| <b>pphouse</b>                                           | <b>Frequency</b> | <b>Percent</b> | <b>Cumulative Frequency</b> | <b>Cumulative Percent</b> |
| <b>A one-family house detached from any other house</b>  | 708.1382         | 70.81          | 708.1382                    | 70.81                     |
| <b>A one-family house attached to one or more houses</b> | 67.5056          | 6.75           | 775.6438                    | 77.56                     |
| <b>A building with 2 or more apartments</b>              | 174.3381         | 17.43          | 949.9819                    | 95.00                     |
| <b>A mobile home</b>                                     | 45.21339         | 4.52           | 995.1953                    | 99.52                     |
| <b>Boat/RV/van etc.</b>                                  | 4.80462          | 0.48           | 999.9999                    | 100.00                    |

| <b>PPNET HHs with Internet Access</b> |                  |                |                             |                           |
|---------------------------------------|------------------|----------------|-----------------------------|---------------------------|
| <b>ppnet</b>                          | <b>Frequency</b> | <b>Percent</b> | <b>Cumulative Frequency</b> | <b>Cumulative Percent</b> |
| <b>Yes</b>                            | 785.7531         | 78.58          | 785.7531                    | 78.58                     |
| <b>No</b>                             | 214.2467         | 21.42          | 999.9999                    | 100.00                    |

| Table of ppgender by q1_dummy           |                  |                  |         |
|-----------------------------------------|------------------|------------------|---------|
| ppgender(PPGENDER<br>Sex of respondent) | q1_dummy         |                  |         |
| Frequency<br>Row Pct                    | important        | unimportant      | Total   |
| male                                    | 304.346<br>63.29 | 176.565<br>36.71 | 480.911 |
| female                                  | 330.418<br>64.39 | 182.77<br>35.61  | 513.188 |
| <b>Total</b>                            | 634.764          | 359.334          | 994.099 |
| <b>Frequency Missing = 5.9011999965</b> |                  |                  |         |

*Statistics for Table of ppgender by q1\_dummy*

| Statistic                   | DF | Value   | Prob   |
|-----------------------------|----|---------|--------|
| Chi-Square                  | 1  | 0.1302  | 0.7183 |
| Likelihood Ratio Chi-Square | 1  | 0.1301  | 0.7183 |
| Continuity Adj. Chi-Square  | 1  | 0.0869  | 0.7682 |
| Mantel-Haenszel Chi-Square  | 1  | 0.1300  | 0.7184 |
| Phi Coefficient             |    | -0.0114 |        |
| Contingency Coefficient     |    | 0.0114  |        |
| Cramer's V                  |    | -0.0114 |        |

*Effective Sample Size = 994.09868015*  
*Frequency Missing = 5.9011999965*

| Table of age4 by q1_dummy               |                  |                  |         |
|-----------------------------------------|------------------|------------------|---------|
| age4                                    | q1_dummy         |                  |         |
| Frequency<br>Row Pct                    | important        | unimportant      | Total   |
| 18-34                                   | 176.727<br>60.01 | 117.76<br>39.99  | 294.488 |
| 35-49                                   | 146.211<br>65.44 | 77.233<br>34.56  | 223.444 |
| 50-64                                   | 188.171<br>65.09 | 100.921<br>34.91 | 289.093 |
| 65+                                     | 123.655<br>66.10 | 63.4199<br>33.90 | 187.075 |
| <b>Total</b>                            | 634.764          | 359.334          | 994.099 |
| <b>Frequency Missing = 5.9011999965</b> |                  |                  |         |

*Statistics for Table of age4 by q1\_dummy*

| Statistic                   | DF | Value  | Prob   |
|-----------------------------|----|--------|--------|
| Chi-Square                  | 3  | 2.7256 | 0.4359 |
| Likelihood Ratio Chi-Square | 3  | 2.7056 | 0.4393 |
| Mantel-Haenszel Chi-Square  | 1  | 1.9648 | 0.1610 |
| Phi Coefficient             |    | 0.0524 |        |
| Contingency Coefficient     |    | 0.0523 |        |
| Cramer's V                  |    | 0.0524 |        |

*Effective Sample Size = 994.09868015*

*Frequency Missing = 5.9011999965*

| Table of income4 by q1_dummy            |                  |                  |         |
|-----------------------------------------|------------------|------------------|---------|
| income4                                 | q1_dummy         |                  |         |
| Frequency<br>Row Pct                    | important        | unimportant      | Total   |
| <\$25K                                  | 114.367<br>65.29 | 60.7993<br>34.71 | 175.166 |
| \$25-49.9K                              | 144.591<br>64.65 | 79.0525<br>35.35 | 223.643 |
| \$50-74.9K                              | 113.761<br>62.07 | 69.5282<br>37.93 | 183.289 |
| \$75K+                                  | 262.046<br>63.60 | 149.954<br>36.40 | 412     |
| <b>Total</b>                            | 634.764          | 359.334          | 994.099 |
| <b>Frequency Missing = 5.9011999965</b> |                  |                  |         |

*Statistics for Table of income4 by q1\_dummy*

| Statistic                   | DF | Value  | Prob   |
|-----------------------------|----|--------|--------|
| Chi-Square                  | 3  | 0.4833 | 0.9225 |
| Likelihood Ratio Chi-Square | 3  | 0.4827 | 0.9227 |
| Mantel-Haenszel Chi-Square  | 1  | 0.2037 | 0.6517 |
| Phi Coefficient             |    | 0.0221 |        |
| Contingency Coefficient     |    | 0.0220 |        |
| Cramer's V                  |    | 0.0221 |        |

*Effective Sample Size = 994.09868015*  
*Frequency Missing = 5.9011999965*

| <b>Table of region by q1_dummy</b>      |                  |                    |              |
|-----------------------------------------|------------------|--------------------|--------------|
| <b>region</b>                           | <b>q1_dummy</b>  |                    |              |
| <b>Frequency<br/>Row Pct</b>            | <b>important</b> | <b>unimportant</b> | <b>Total</b> |
| <b>Northeast</b>                        | 112.732<br>61.61 | 70.2582<br>38.39   | 182.99       |
| <b>Midwest</b>                          | 138.596<br>65.73 | 72.2446<br>34.27   | 210.841      |
| <b>South</b>                            | 235.16<br>63.35  | 136.027<br>36.65   | 371.188      |
| <b>West</b>                             | 148.276<br>64.73 | 80.8042<br>35.27   | 229.08       |
| <b>Total</b>                            | 634.764          | 359.334            | 994.099      |
| <b>Frequency Missing = 5.9011999965</b> |                  |                    |              |

*Statistics for Table of region by q1\_dummy*

| <b>Statistic</b>                   | <b>DF</b> | <b>Value</b> | <b>Prob</b> |
|------------------------------------|-----------|--------------|-------------|
| <b>Chi-Square</b>                  | 3         | 0.8399       | 0.8399      |
| <b>Likelihood Ratio Chi-Square</b> | 3         | 0.8392       | 0.8401      |
| <b>Mantel-Haenszel Chi-Square</b>  | 1         | 0.1615       | 0.6878      |
| <b>Phi Coefficient</b>             |           | 0.0291       |             |
| <b>Contingency Coefficient</b>     |           | 0.0291       |             |
| <b>Cramer's V</b>                  |           | 0.0291       |             |

*Effective Sample Size = 994.09868015*  
*Frequency Missing = 5.9011999965*

| <b>Table of ppethm by q1_dummy</b>      |                  |                    |              |
|-----------------------------------------|------------------|--------------------|--------------|
| <b>ppethm(PPETHM Race)</b>              | <b>q1_dummy</b>  |                    |              |
| <b>Frequency Row Pct</b>                | <b>important</b> | <b>unimportant</b> | <b>Total</b> |
| <b>White, Non-Hispanic</b>              | 403.346<br>61.64 | 251.057<br>38.36   | 654.402      |
| <b>Black, Non-Hispanic</b>              | 78.7736<br>67.92 | 37.2077<br>32.08   | 115.981      |
| <b>Other, Non-Hispanic</b>              | 39.4285<br>62.59 | 23.5702<br>37.41   | 62.9988      |
| <b>Hispanic</b>                         | 103.402<br>69.53 | 45.3079<br>30.47   | 148.71       |
| <b>2+ Races, Non-Hispanic</b>           | 9.81472<br>81.74 | 2.19186<br>18.26   | 12.0066      |
| <b>Total</b>                            | 634.764          | 359.334            | 994.099      |
| <b>Frequency Missing = 5.9011999965</b> |                  |                    |              |

*Statistics for Table of ppethm by q1\_dummy*

| <b>Statistic</b>                   | <b>DF</b> | <b>Value</b> | <b>Prob</b> |
|------------------------------------|-----------|--------------|-------------|
| <b>Chi-Square</b>                  | 4         | 6.0121       | 0.1982      |
| <b>Likelihood Ratio Chi-Square</b> | 4         | 6.2582       | 0.1807      |
| <b>Mantel-Haenszel Chi-Square</b>  | 1         | 4.3899       | 0.0362      |
| <b>Phi Coefficient</b>             |           | 0.0778       |             |
| <b>Contingency Coefficient</b>     |           | 0.0775       |             |
| <b>Cramer's V</b>                  |           | 0.0778       |             |

*Effective Sample Size = 994.09868015*

*Frequency Missing = 5.9011999965*

| <b>Table of ppeduc by q1_dummy</b>      |                  |                    |              |
|-----------------------------------------|------------------|--------------------|--------------|
| <b>ppeduc(PPEDUC Education)</b>         | <b>q1_dummy</b>  |                    |              |
| <b>Frequency<br/>Row Pct</b>            | <b>important</b> | <b>unimportant</b> | <b>Total</b> |
| <b>Less than HS graduate</b>            | 74.0026<br>60.58 | 48.1575<br>39.42   | 122.16       |
| <b>HS grad</b>                          | 193.128<br>65.90 | 99.9359<br>34.10   | 293.063      |
| <b>Some college, no degree</b>          | 131.569<br>66.28 | 66.945<br>33.72    | 198.514      |
| <b>Associate degree</b>                 | 53.9944<br>61.06 | 34.4399<br>38.94   | 88.4344      |
| <b>Bachelor degree</b>                  | 106.335<br>64.93 | 57.4303<br>35.07   | 163.766      |
| <b>Master degree</b>                    | 59.6623<br>59.19 | 41.1376<br>40.81   | 100.8        |
| <b>Professional or Doctorate degree</b> | 16.0734<br>58.74 | 11.2881<br>41.26   | 27.3615      |
| <b>Total</b>                            | 634.764          | 359.334            | 994.099      |
| <b>Frequency Missing = 5.9011999965</b> |                  |                    |              |

*Statistics for Table of ppeduc by q1\_dummy*

| <b>Statistic</b>                   | <b>DF</b> | <b>Value</b> | <b>Prob</b> |
|------------------------------------|-----------|--------------|-------------|
| <b>Chi-Square</b>                  | 6         | 3.2464       | 0.7773      |
| <b>Likelihood Ratio Chi-Square</b> | 6         | 3.2251       | 0.7801      |
| <b>Mantel-Haenszel Chi-Square</b>  | 1         | 0.4300       | 0.5120      |
| <b>Phi Coefficient</b>             |           | 0.0571       |             |
| <b>Contingency Coefficient</b>     |           | 0.0571       |             |
| <b>Cramer's V</b>                  |           | 0.0571       |             |

*Effective Sample Size = 994.09868015*

*Frequency Missing = 5.9011999965*

| <b>Table of pparit by q1_dummy</b>         |                  |                    |              |
|--------------------------------------------|------------------|--------------------|--------------|
| <b>ppmarit(PPMARIT<br/>Marital status)</b> | <b>q1_dummy</b>  |                    |              |
| <b>Frequency<br/>Row Pct</b>               | <b>important</b> | <b>unimportant</b> | <b>Total</b> |
| <b>Married</b>                             | 322.385<br>61.72 | 199.94<br>38.28    | 522.326      |
| <b>Widowed</b>                             | 32.065<br>70.68  | 13.2999<br>29.32   | 45.3648      |
| <b>Divorced</b>                            | 68.1236<br>72.02 | 26.4728<br>27.98   | 94.5963      |
| <b>Separated</b>                           | 12.3055<br>74.72 | 4.16419<br>25.28   | 16.4697      |
| <b>Never married</b>                       | 159.07<br>62.63  | 94.8973<br>37.37   | 253.967      |
| <b>Living with partner</b>                 | 40.8154<br>66.50 | 20.56<br>33.50     | 61.3754      |
| <b>Total</b>                               | 634.764          | 359.334            | 994.099      |
| <b>Frequency Missing = 5.9011999965</b>    |                  |                    |              |

*Statistics for Table of pparit by q1\_dummy*

| <b>Statistic</b>                   | <b>DF</b> | <b>Value</b> | <b>Prob</b> |
|------------------------------------|-----------|--------------|-------------|
| <b>Chi-Square</b>                  | 5         | 5.8676       | 0.3193      |
| <b>Likelihood Ratio Chi-Square</b> | 5         | 6.0469       | 0.3017      |
| <b>Mantel-Haenszel Chi-Square</b>  | 1         | 0.4676       | 0.4941      |
| <b>Phi Coefficient</b>             |           | 0.0768       |             |
| <b>Contingency Coefficient</b>     |           | 0.0766       |             |
| <b>Cramer's V</b>                  |           | 0.0768       |             |

*Effective Sample Size = 994.09868015*  
*Frequency Missing = 5.9011999965*

| Table of ppwork by q1_dummy                  |                  |                  |         |
|----------------------------------------------|------------------|------------------|---------|
| ppwork(PPWORK Employment Status)             | q1_dummy         |                  |         |
| Frequency<br>Row Pct                         | important        | unimportant      | Total   |
| Working-as a paid employee                   | 308.346<br>62.58 | 184.348<br>37.42 | 492.694 |
| Working-self-employed                        | 44.3756<br>70.76 | 18.334<br>29.24  | 62.7096 |
| Not working - on temporary layoff from a job | 5.38224<br>81.75 | 1.20184<br>18.25 | 6.58408 |
| Not working - looking for work               | 59.6033<br>68.82 | 27.0009<br>31.18 | 86.6043 |
| Not working - retired                        | 107.783<br>63.09 | 63.0606<br>36.91 | 170.843 |
| Not working - disabled                       | 42.7957<br>62.06 | 26.1658<br>37.94 | 68.9615 |
| Not working - other                          | 66.479<br>62.89  | 39.2228<br>37.11 | 105.702 |
| <b>Total</b>                                 | 634.764          | 359.334          | 994.099 |
| <b>Frequency Missing = 5.9011999965</b>      |                  |                  |         |

*Statistics for Table of ppwork by q1\_dummy*

| Statistic                   | DF | Value  | Prob   |
|-----------------------------|----|--------|--------|
| Chi-Square                  | 6  | 3.6633 | 0.7221 |
| Likelihood Ratio Chi-Square | 6  | 3.8275 | 0.7000 |
| Mantel-Haenszel Chi-Square  | 1  | 0.0037 | 0.9515 |
| Phi Coefficient             |    | 0.0607 |        |
| Contingency Coefficient     |    | 0.0606 |        |
| Cramer's V                  |    | 0.0607 |        |

*Effective Sample Size = 994.09868015*

*Frequency Missing = 5.9011999965*

| Table of pprent by q1_dummy                               |                  |                  |        |
|-----------------------------------------------------------|------------------|------------------|--------|
| pprent(PPRENT Own or rent home)                           | q1_dummy         |                  |        |
| Frequency<br>Row Pct                                      | important        | unimportant      | Total  |
| Owned or being bought by you or someone in your household | 444.487<br>64.35 | 246.283<br>35.65 | 690.77 |

|                                              |                  |                  |         |
|----------------------------------------------|------------------|------------------|---------|
| <b>Rented for cash</b>                       | 168.416<br>62.86 | 99.4996<br>37.14 | 267.916 |
| <b>Occupied without payment of cash rent</b> | 21.8607<br>61.73 | 13.5517<br>38.27 | 35.4123 |
| <b>Total</b>                                 | 634.764          | 359.334          | 994.099 |
| <b>Frequency Missing = 5.9011999965</b>      |                  |                  |         |

*Statistics for Table of pprent by q1\_dummy*

| <b>Statistic</b>                   | <b>DF</b> | <b>Value</b> | <b>Prob</b> |
|------------------------------------|-----------|--------------|-------------|
| <b>Chi-Square</b>                  | 2         | 0.2560       | 0.8798      |
| <b>Likelihood Ratio Chi-Square</b> | 2         | 0.2552       | 0.8802      |
| <b>Mantel-Haenszel Chi-Square</b>  | 1         | 0.2546       | 0.6139      |
| <b>Phi Coefficient</b>             |           | 0.0160       |             |
| <b>Contingency Coefficient</b>     |           | 0.0160       |             |
| <b>Cramer's V</b>                  |           | 0.0160       |             |

*Effective Sample Size = 994.09868015*

*Frequency Missing = 5.9011999965*

| <b>Table of pphouse by q1_dummy</b>                      |                  |                    |              |
|----------------------------------------------------------|------------------|--------------------|--------------|
| <b>pphouse(PPHOUSE Housing type)</b>                     | <b>q1_dummy</b>  |                    |              |
| <b>Frequency<br/>Row Pct</b>                             | <b>important</b> | <b>unimportant</b> | <b>Total</b> |
| <b>A one-family house detached from any other house</b>  | 452.114<br>64.38 | 250.123<br>35.62   | 702.237      |
| <b>A one-family house attached to one or more houses</b> | 41.2287<br>61.07 | 26.2769<br>38.93   | 67.5056      |
| <b>A building with 2 or more apartments</b>              | 115.049<br>65.99 | 59.2887<br>34.01   | 174.338      |
| <b>A mobile home</b>                                     | 25.2777<br>55.91 | 19.9357<br>44.09   | 45.2134      |
| <b>Boat/RV/van etc.</b>                                  | 1.09507<br>22.79 | 3.70955<br>77.21   | 4.80462      |
| <b>Total</b>                                             | 634.764          | 359.334            | 994.099      |
| <b>Frequency Missing = 5.9011999965</b>                  |                  |                    |              |

*Statistics for Table of pphouse by q1\_dummy*

| Statistic                   | DF | Value  | Prob   |
|-----------------------------|----|--------|--------|
| Chi-Square                  | 4  | 5.4028 | 0.2484 |
| Likelihood Ratio Chi-Square | 4  | 5.2359 | 0.2639 |
| Mantel-Haenszel Chi-Square  | 1  | 0.8052 | 0.3695 |
| Phi Coefficient             |    | 0.0737 |        |
| Contingency Coefficient     |    | 0.0735 |        |
| Cramer's V                  |    | 0.0737 |        |

*Effective Sample Size = 994.09868015*  
*Frequency Missing = 5.9011999965*

| Table of ppnet by q1_dummy                     |                  |                  |         |
|------------------------------------------------|------------------|------------------|---------|
| ppnet(PPNET<br>HHs with<br>Internet<br>Access) | q1_dummy         |                  |         |
|                                                | important        | unimportant      | Total   |
| Yes                                            | 507.966<br>64.71 | 277.077<br>35.29 | 785.042 |
| No                                             | 126.799<br>60.65 | 82.2574<br>39.35 | 209.056 |
| <b>Total</b>                                   | 634.764          | 359.334          | 994.099 |
| <b>Frequency Missing = 5.9011999965</b>        |                  |                  |         |

*Statistics for Table of ppnet by q1\_dummy*

| Statistic                   | DF | Value  | Prob   |
|-----------------------------|----|--------|--------|
| Chi-Square                  | 1  | 1.1747 | 0.2784 |
| Likelihood Ratio Chi-Square | 1  | 1.1646 | 0.2805 |
| Continuity Adj. Chi-Square  | 1  | 1.0057 | 0.3159 |
| Mantel-Haenszel Chi-Square  | 1  | 1.1735 | 0.2787 |
| Phi Coefficient             |    | 0.0344 |        |
| Contingency Coefficient     |    | 0.0344 |        |
| Cramer's V                  |    | 0.0344 |        |

*Effective Sample Size = 994.09868015*  
*Frequency Missing = 5.9011999965*

| Model Information                |                         |                   |
|----------------------------------|-------------------------|-------------------|
| <b>Data Set</b>                  | WORK.PAY                |                   |
| <b>Response Variable</b>         | q1_dummy                |                   |
| <b>Number of Response Levels</b> | 2                       |                   |
| <b>Weight Variable</b>           | wmid1                   | Numeric for wmid1 |
| <b>Model</b>                     | Binary Logit            |                   |
| <b>Optimization Technique</b>    | Fisher's Scoring        |                   |
| <b>Variance Adjustment</b>       | Degrees of Freedom (DF) |                   |

| Variance Estimation        |                         |
|----------------------------|-------------------------|
| <b>Method</b>              | Taylor Series           |
| <b>Variance Adjustment</b> | Degrees of Freedom (DF) |

|                                    |          |
|------------------------------------|----------|
| <b>Number of Observations Read</b> | 1005     |
| <b>Number of Observations Used</b> | 1000     |
| <b>Sum of Weights Read</b>         | 999.9999 |
| <b>Sum of Weights Used</b>         | 994.0987 |

| Response Profile |             |                 |              |
|------------------|-------------|-----------------|--------------|
| Ordered Value    | q1_dummy    | Total Frequency | Total Weight |
| 1                | important   | 633             | 634.76433    |
| 2                | unimportant | 367             | 359.33435    |

*Probability modeled is q1\_dummy='unimportant'.*

**Note:** 5 observations were deleted due to missing values for the response or explanatory variables.

| Class Level Information |        |                  |   |   |
|-------------------------|--------|------------------|---|---|
| Class                   | Value  | Design Variables |   |   |
| ppgender                | female | 1                |   |   |
|                         | male   | 0                |   |   |
| age4                    | 18-34  | 1                | 0 | 0 |
|                         | 35-49  | 0                | 1 | 0 |

| Class Level Information |            |                  |   |   |
|-------------------------|------------|------------------|---|---|
| Class                   | Value      | Design Variables |   |   |
|                         | 50-64      | 0                | 0 | 1 |
|                         | 65+        | 0                | 0 | 0 |
| income4                 | \$25-49.9K | 1                | 0 | 0 |
|                         | \$50-74.9K | 0                | 1 | 0 |
|                         | \$75K+     | 0                | 0 | 0 |
|                         | <\$25K     | 0                | 0 | 1 |
| region                  | Midwest    | 1                | 0 | 0 |
|                         | Northeast  | 0                | 0 | 0 |
|                         | South      | 0                | 1 | 0 |
|                         | West       | 0                | 0 | 1 |

| Model Convergence Status                      |
|-----------------------------------------------|
| Convergence criterion (GCONV=1E-8) satisfied. |

| Model Fit Statistics |                |                          |
|----------------------|----------------|--------------------------|
| Criterion            | Intercept Only | Intercept and Covariates |
| AIC                  | 1302.794       | 1318.501                 |
| SC                   | 1307.702       | 1372.486                 |
| -2 Log L             | 1300.794       | 1296.501                 |

| Testing Global Null Hypothesis: BETA=0 |            |    |            |
|----------------------------------------|------------|----|------------|
| Test                                   | Chi-Square | DF | Pr > ChiSq |
| Likelihood Ratio                       | 4.2931     | 10 | 0.9332     |
| Score                                  | 4.3120     | 10 | 0.9322     |
| Wald                                   | 3.9758     | 10 | 0.9484     |

| Type 3 Analysis of Effects |    |                 |            |
|----------------------------|----|-----------------|------------|
| Effect                     | DF | Wald Chi-Square | Pr > ChiSq |
| ppgender                   | 1  | 0.0716          | 0.7890     |
| age4                       | 3  | 2.6566          | 0.4477     |
| income4                    | 3  | 0.4401          | 0.9318     |
| region                     | 3  | 0.9030          | 0.8247     |

| Analysis of Maximum Likelihood Estimates |            |    |          |                |                 |            |
|------------------------------------------|------------|----|----------|----------------|-----------------|------------|
| Parameter                                |            | DF | Estimate | Standard Error | Wald Chi-Square | Pr > ChiSq |
| Intercept                                |            | 1  | -0.5370  | 0.2555         | 4.4191          | 0.0355     |
| ppgender                                 | female     | 1  | -0.0375  | 0.1403         | 0.0716          | 0.7890     |
| age4                                     | 18-34      | 1  | 0.2708   | 0.2192         | 1.5261          | 0.2167     |
| age4                                     | 35-49      | 1  | 0.0268   | 0.2350         | 0.0130          | 0.9092     |
| age4                                     | 50-64      | 1  | 0.0493   | 0.2246         | 0.0481          | 0.8264     |
| income4                                  | \$25-49.9K | 1  | -0.0541  | 0.1889         | 0.0820          | 0.7746     |
| income4                                  | \$50-74.9K | 1  | 0.0600   | 0.1839         | 0.1063          | 0.7444     |
| income4                                  | <\$25K     | 1  | -0.0791  | 0.2179         | 0.1319          | 0.7165     |
| region                                   | Midwest    | 1  | -0.1768  | 0.2203         | 0.6439          | 0.4223     |
| region                                   | South      | 1  | -0.0685  | 0.2060         | 0.1107          | 0.7394     |
| region                                   | West       | 1  | -0.1629  | 0.2220         | 0.5380          | 0.4633     |

| Odds Ratio Estimates |                      |                |                            |
|----------------------|----------------------|----------------|----------------------------|
| Effect               |                      | Point Estimate | 95% Wald Confidence Limits |
| ppgender             | female vs male       | 0.963          | 0.732 1.268                |
| age4                 | 18-34 vs 65+         | 1.311          | 0.853 2.015                |
| age4                 | 35-49 vs 65+         | 1.027          | 0.648 1.628                |
| age4                 | 50-64 vs 65+         | 1.051          | 0.676 1.631                |
| income4              | \$25-49.9K vs \$75K+ | 0.947          | 0.654 1.372                |
| income4              | \$50-74.9K vs \$75K+ | 1.062          | 0.741 1.522                |
| income4              | <\$25K vs \$75K+     | 0.924          | 0.603 1.416                |
| region               | Midwest vs Northeast | 0.838          | 0.544 1.291                |

| <b>Odds Ratio Estimates</b>      |                       |                                   |       |
|----------------------------------|-----------------------|-----------------------------------|-------|
| <b>Effect</b>                    | <b>Point Estimate</b> | <b>95% Wald Confidence Limits</b> |       |
| <b>region South vs Northeast</b> | 0.934                 | 0.624                             | 1.398 |
| <b>region West vs Northeast</b>  | 0.850                 | 0.550                             | 1.313 |

| <b>Association of Predicted Probabilities and Observed Responses</b> |        |                  |       |
|----------------------------------------------------------------------|--------|------------------|-------|
| <b>Percent Concordant</b>                                            | 52.1   | <b>Somers' D</b> | 0.066 |
| <b>Percent Discordant</b>                                            | 45.5   | <b>Gamma</b>     | 0.068 |
| <b>Percent Tied</b>                                                  | 2.3    | <b>Tau-a</b>     | 0.031 |
| <b>Pairs</b>                                                         | 232311 | <b>c</b>         | 0.533 |
